# Supplementary material for: External Stresses Affect Gonococcal Type 4 Pilus Dynamics
Source: Front Microbiol. 2022 Feb 25;13:839711. doi: 10.3389/fmicb.2022.839711 (PMC8914258; doi:10.3389/fmicb.2022.839711)
Supplement: Supplementary file 2 [file Data_Sheet_2.xlsx]

## Sheet: Azithromycin 15 min
Data Sheet 2, DGE of the genes involved in the formation of the pilus, 15 min Azithromycin treatment
Gene ID in MS11	baseMean	log2FoldChange	P-value	adj. P-value	Genename	Gene ID in FA1090	product	Genename (manually annotated)
NGFG_01202	1894.37	-0.426103	4.9091e-06	7.19643e-05	pilW	NGO_0595	type IV pilus biogenesis/stability protein PilW	pilW
NGFG_01979	21875.9	-0.399653	0.000139084	0.00123532		NGO_1909	twitching motility protein	pilU
NGFG_00608	5949.84	-0.343824	0.0510089	0.149136		NGO_0454	type IV pilus assembly protein	pilJ
NGFG_00232	40743.9	-0.34144	3.50213e-05	0.000373944	pilQ	NGO_0094	type IV pilus biogenesis and competence protein pilQ	pilQ
NGFG_00235	7791.51	-0.323413	0.00724411	0.0335427	pilN	NGO_0097	type IV pilus assembly protein PilN	pilN
NGFG_00607	4895.64	-0.31355	0.0385104	0.121856	pilV	NGO_0453	type IV pilus modification protein PilV	pilI
NGFG_02119	5307.22	-0.309145	0.000643244	0.00458722	pilG	NGO_1669	type IV pilus assembly protein PilC	pilG
NGFG_00606	5902.82	-0.26666	0.0167759	0.0651692		NGO_0452	prepilin-type N-terminal cleavage/methylation domain-containing protein	pilH
NGFG_01980	27677.4	-0.25511	0.0257463	0.0909435	pilT	NGO_1908	twitching motility protein	pilT
NGFG_00236	15480.1	-0.185415	0.0385537	0.121856	pilM	NGO_0098	type IV pilus assembly protein PilM	pilM
NGFG_00609	4551.77	-0.15755	0.353283	0.536375	pilX	NGO_0455	type IV pilus assembly protein PilX	pilK
NGFG_01006	1180.92	-0.133253	0.308222	0.493257		NGO_0783	hypothetical protein	tfpC
NGFG_00498	10879.3	-0.0920181	0.100277	0.238199		NGO_0346	twitching motility protein	pilT2
NGFG_00234	9769.28	-0.0468021	0.621753	0.77085	pilO	NGO_0096	type IV pilus assembly protein PilO	pilO
NGFG_01821	43694.9	0.00707971	0.950248	0.973635	pilE		pilin pilE	pilE
NGFG_01977	7199.23	0.0231033	0.730331	0.839945	pilC	NGO_0055	type IV pilus assembly protein PilC	pilC1
NGFG_01479	702.41	0.0662747	0.577525	0.736608		NGO_1441	prepilin-type N-terminal cleavage/methylation domain-containing protein	pilV
NGFG_02184	86.5147	0.0788379	0.760468	0.8603		NGO_1177	pilin	comP
NGFG_02120	1873.24	0.102283	0.188765	0.360907		NGO_1670	type 4 prepilin-like protein leader peptide-processing enzyme	pilD
NGFG_00233	8534.15	0.217908	0.0475628	0.142107	pilP	NGO_0095	type IV pilus assembly protein PilP	pilP
NGFG_02123	16524.2	0.271086	0.00627648	0.02984	pilF	NGO_1673	type IV pilus assembly protein pilF	pilF
NGFG_00610	3082.82	0.311572	0.128369	0.280573		NGO_0456	prepilin-type N-terminal cleavage/methylation domain-containing protein	pilL

## Sheet: Azithromycin 60 min
Data Sheet 2, DGE of the genes involved in the formation of the pilus, 60 min Azithromycin treatment
Gene ID in MS11	baseMean	log2FoldChange	P-value	adj. P-value	Genename	Gene ID in FA1090	product	Genename (manually annotated)
NGFG_00232	40743.9	-1.10038	1.42861e-40	1.9372e-38	pilQ	NGO_0094	type IV pilus biogenesis and competence protein pilQ	pilQ
NGFG_00235	7791.51	-0.983015	3.1616e-16	5.35891e-15	pilN	NGO_0097	type IV pilus assembly protein PilN	pilN
NGFG_01202	1894.37	-0.819163	1.13258e-18	2.55962e-17	pilW	NGO_0595	type IV pilus biogenesis/stability protein PilW	pilW
NGFG_02119	5307.22	-0.753265	8.14567e-17	1.47931e-15	pilG	NGO_1669	type IV pilus assembly protein PilC	pilG
NGFG_00236	15480.1	-0.724349	6.02809e-16	9.96841e-15	pilM	NGO_0098	type IV pilus assembly protein PilM	pilM
NGFG_01979	21875.9	-0.695961	3.16894e-11	3.11383e-10		NGO_1909	twitching motility protein	pilU
NGFG_00234	9769.28	-0.655939	4.49069e-12	4.96417e-11	pilO	NGO_0096	type IV pilus assembly protein PilO	pilO
NGFG_00498	10879.3	-0.51855	1.34118e-20	3.68643e-19		NGO_0346	twitching motility protein	pilT2
NGFG_00608	5949.84	-0.516686	0.00332606	0.00886659		NGO_0454	type IV pilus assembly protein	pilJ
NGFG_01980	27677.4	-0.425075	0.000201074	0.000687367	pilT	NGO_1908	twitching motility protein	pilT
NGFG_00609	4551.77	-0.40829	0.0159918	0.0358406	pilX	NGO_0455	type IV pilus assembly protein PilX	pilK
NGFG_01006	1180.92	-0.398651	0.00213021	0.00591111		NGO_0783	hypothetical protein	tfpC
NGFG_00607	4895.64	-0.390479	0.00978473	0.0236087	pilV	NGO_0453	type IV pilus modification protein PilV	pilI
NGFG_01821	43694.9	-0.390211	0.000582651	0.00181766	pilE		pilin pilE	pilE
NGFG_01977	7199.23	-0.317802	1.86858e-06	9.45447e-06	pilC	NGO_0055	type IV pilus assembly protein PilC	pilC1
NGFG_00606	5902.82	-0.247803	0.0257151	0.0543707		NGO_0452	prepilin-type N-terminal cleavage/methylation domain-containing protein	pilH
NGFG_00233	8534.15	-0.230641	0.0357748	0.071903	pilP	NGO_0095	type IV pilus assembly protein PilP	pilP
NGFG_01479	702.41	-0.0177992	0.879367	0.923881		NGO_1441	prepilin-type N-terminal cleavage/methylation domain-containing protein	pilV
NGFG_00610	3082.82	0.281794	0.168489	0.263823		NGO_0456	prepilin-type N-terminal cleavage/methylation domain-containing protein	pilL
NGFG_02123	16524.2	0.31758	0.00134964	0.00393856	pilF	NGO_1673	type IV pilus assembly protein pilF	pilF
NGFG_02120	1873.24	0.327378	2.35205e-05	9.86406e-05		NGO_1670	type 4 prepilin-like protein leader peptide-processing enzyme	pilD
NGFG_02184	86.5147	0.40763	0.114272	0.193369		NGO_1177	pilin	comP

## Sheet: Ceftriaxone 15 min
Data Sheet 2, DGE of the genes involved in the formation of the pilus, 60 min Ceftriaxone treatment
Gene ID in MS11	baseMean	log2FoldChange	P-value	adj. P-value	Genename	Gene ID in FA1090	product	Genename (manually annotated)
NGFG_00607	4895.64	-0.238287	0.11534	0.486498	pilV	NGO_0453	type IV pilus modification protein PilV	pilI
NGFG_01980	27677.4	-0.221851	0.0523897	0.342439	pilT	NGO_1908	twitching motility protein	pilT
NGFG_02184	86.5147	-0.218402	0.39752	NaN		NGO_1177	pilin	comP
NGFG_00606	5902.82	-0.204418	0.0662414	0.376258		NGO_0452	prepilin-type N-terminal cleavage/methylation domain-containing protein	pilH
NGFG_01821	43694.9	-0.200073	0.0778152	0.400888	pilE		pilin pilE	pilE
NGFG_00608	5949.84	-0.173282	0.324933	0.7408		NGO_0454	type IV pilus assembly protein	pilJ
NGFG_01479	702.41	-0.159923	0.176933	0.585411		NGO_1441	prepilin-type N-terminal cleavage/methylation domain-containing protein	pilV
NGFG_01979	21875.9	-0.154132	0.141457	0.536833		NGO_1909	twitching motility protein	pilU
NGFG_02119	5307.22	-0.148164	0.100656	0.446739	pilG	NGO_1669	type IV pilus assembly protein PilC	pilG
NGFG_01202	1894.37	-0.139467	0.130413	0.518617	pilW	NGO_0595	type IV pilus biogenesis/stability protein PilW	pilW
NGFG_00235	7791.51	-0.109317	0.363309	0.769884	pilN	NGO_0097	type IV pilus assembly protein PilN	pilN
NGFG_00609	4551.77	-0.107491	0.526125	0.855908	pilX	NGO_0455	type IV pilus assembly protein PilX	pilK
NGFG_00234	9769.28	-0.101554	0.28388	0.707111	pilO	NGO_0096	type IV pilus assembly protein PilO	pilO
NGFG_00610	3082.82	-0.0848279	0.678881	0.908221		NGO_0456	prepilin-type N-terminal cleavage/methylation domain-containing protein	pilL
NGFG_00236	15480.1	-0.0813828	0.363311	0.769884	pilM	NGO_0098	type IV pilus assembly protein PilM	pilM
NGFG_02123	16524.2	-0.0546712	0.581457	0.875562	pilF	NGO_1673	type IV pilus assembly protein pilF	pilF
NGFG_00498	10879.3	-0.0318672	0.567787	0.875562		NGO_0346	twitching motility protein	pilT2
NGFG_00233	8534.15	-0.00242427	0.982406	0.995141	pilP	NGO_0095	type IV pilus assembly protein PilP	pilP
NGFG_00232	40743.9	0.0484794	0.556532	0.872151	pilQ	NGO_0094	type IV pilus biogenesis and competence protein pilQ	pilQ
NGFG_01006	1180.92	0.0809659	0.532753	0.856611		NGO_0783	hypothetical protein	tfpC
NGFG_01977	7199.23	0.122099	0.0673831	0.377716	pilC	NGO_0055	type IV pilus assembly protein PilC	pilC1
NGFG_02120	1873.24	0.145552	0.059173	0.363974		NGO_1670	type 4 prepilin-like protein leader peptide-processing enzyme	pilD

## Sheet: Ceftriaxone 60 min
Data Sheet 2, DGE of the genes involved in the formation of the pilus, 60 min Ceftriaxone treatment
Gene ID in MS11	baseMean	log2FoldChange	P-value	adj. P-value	Genename	Gene ID in FA1090	product	Genename (manually annotated)
NGFG_00235	7791.51	-0.45081	0.000180305	0.00291171	pilN	NGO_0097	type IV pilus assembly protein PilN	pilN
NGFG_01479	702.41	-0.450457	0.000177819	0.00289549		NGO_1441	prepilin-type N-terminal cleavage/methylation domain-containing protein	pilV
NGFG_00236	15480.1	-0.447888	5.803e-07	2.91227e-05	pilM	NGO_0098	type IV pilus assembly protein PilM	pilM
NGFG_00234	9769.28	-0.425606	7.29144e-06	0.000229798	pilO	NGO_0096	type IV pilus assembly protein PilO	pilO
NGFG_00233	8534.15	-0.361996	0.00100672	0.0108084	pilP	NGO_0095	type IV pilus assembly protein PilP	pilP
NGFG_00232	40743.9	-0.301817	0.00025317	0.0037186	pilQ	NGO_0094	type IV pilus biogenesis and competence protein pilQ	pilQ
NGFG_01821	43694.9	-0.299615	0.00828152	0.0528826	pilE		pilin pilE	pilE
NGFG_00607	4895.64	-0.293382	0.0525576	0.199801	pilV	NGO_0453	type IV pilus modification protein PilV	pilI
NGFG_00608	5949.84	-0.203254	0.248323	0.507169		NGO_0454	type IV pilus assembly protein	pilJ
NGFG_02119	5307.22	-0.186965	0.0386447	0.166326	pilG	NGO_1669	type IV pilus assembly protein PilC	pilG
NGFG_00606	5902.82	-0.17585	0.114166	0.321442		NGO_0452	prepilin-type N-terminal cleavage/methylation domain-containing protein	pilH
NGFG_01980	27677.4	-0.161405	0.158192	0.389717	pilT	NGO_1908	twitching motility protein	pilT
NGFG_01202	1894.37	-0.160961	0.0821632	0.261477	pilW	NGO_0595	type IV pilus biogenesis/stability protein PilW	pilW
NGFG_00609	4551.77	-0.159764	0.346196	0.607392	pilX	NGO_0455	type IV pilus assembly protein PilX	pilK
NGFG_01979	21875.9	-0.159006	0.129409	0.342171		NGO_1909	twitching motility protein	pilU
NGFG_01977	7199.23	-0.140763	0.0352952	0.157459	pilC	NGO_0055	type IV pilus assembly protein PilC	pilC1
NGFG_00498	10879.3	-0.127551	0.0222629	0.112118		NGO_0346	twitching motility protein	pilT2
NGFG_02184	86.5147	-0.112148	0.675983	0.826959		NGO_1177	pilin	comP
NGFG_02123	16524.2	-0.0709347	0.474732	0.695371	pilF	NGO_1673	type IV pilus assembly protein pilF	pilF
NGFG_01006	1180.92	-0.0654229	0.615353	0.792173		NGO_0783	hypothetical protein	tfpC
NGFG_00610	3082.82	-0.0619081	0.762685	0.873259		NGO_0456	prepilin-type N-terminal cleavage/methylation domain-containing protein	pilL
NGFG_02120	1873.24	0.253651	0.00122409	0.0125229		NGO_1670	type 4 prepilin-like protein leader peptide-processing enzyme	pilD
